# Supplementary material for: Electrochemotherapy in Basal &amp; Squamous Cell Carcinoma of Head &amp; Neck; A Prospective Study
Source: Research Square preprint supplement (doi:10.21203/rs.3.rs-7626682/v1), 2025-10-18
Supplement: Supplementary file 1 [file 28d550a9623b16f6b1786cbb.docx]

***Electrochemotherapy in*** ***Basal & Squamous Cell Carcinoma of Head & Neck; A Prospective Study***

*Farrokh Heidari1.6,#, Mahdis Bayat 1,2,3,#, Alireza Namvari1,4, Seyyed Mojtaba Yazdanparast1,2, Sepideh Mansouri1,4*, *Farshid Rostami Pouria1,2 , Amirhossein ghabasiah6 , Navid Manoochehri1,2, Negar Hemmati1,2, Sama Mansouri1,4, Nasim Sharghi1, S. M. Sadegh Mousavi-kiasary1,2, Omid Nabavian4, Habibollah Mahmoodzadeh8,4, Niloufar Shabani3, Farbood farahbakhsh6, Seyed Hadi Samimi Ardestani6, Alireza Mohamadian1, Seyede Misha Seyednia7, Baran Mehdizadeh5, Seyed Rouhollah Miri1,4,8*, Ebrahim Karimi1.6* , Mohammad Abdolahad1,2,3**

1. *Cancer Electronics Research Center, University of Tehran and Tehran University of Medical Sciences Imam Khomeini Hospital, Tehran 14197-33141, Iran*
2. *Nano Bioelectronics Devices Lab, Cancer Electronics Research Group, School of Electrical and Computer Engineering, University of Tehran, Tehran, Iran*
3. *Faculty of Medicine, Shahid Beheshti University of Medical Sciences, Tehran, Iran*
4. *Cancer Institute, Imam-Khomeini Hospital, Tehran University of Medical Sciences, Tehran 14166-34793, Iran*
5. *School of Medicine, Tehran University of Medical Sciences, Tehran, Iran*
6. *Otorhinolaryngology Research Center, AmirAlam Hospital, Tehran University of Medical Sciences, Tehran, Iran*
7. *Anesthesiology and intensive care, Amir-Alam Hospital, Tehran University of Medical Sciences, Tehran, Iran*
8. *Department of Surgical Oncology, Tehran University of Medical Science, Tehran 14176-14411, Iran*
9. *General surgery department, Amir-Alam hospital, Tehran University of Medical Sciences, Tehran, Iran*

***#****Authors with the same contribution.*

* Corresponding authors:

- Mohammad Abdolahad: Full Professor, Director of Nanobioelectronics Devices Lab (NBEL), School of Electrical and Computer Engineering, University of Tehran. Adjunct Professor, Cancer Institute, Tehran University of Medical Sciences. E-mail: [m.abdolahad@ut.ac.ir](mailto:m.abdolahad@ut.ac.ir), [abdolahad@tums.ac.ir](mailto:abdolahad@tums.ac.ir) (ORCID: [0000-0002-1091-3095](https://orcid.org/0000-0002-1091-3095?lang=en)). Tel: +989122079914
  - Ebrahim Karimi, Associate Professor, Otorhinolaryngology Research Center, AmirAlam Hospital, Tehran University of Medical Sciences, Tehran, Iran. E-mail: [Farrokh.heidari@yahoo.com](mailto:Farrokh.heidari@yahoo.com), (ORCID: 0000-0002-6904-5691)
  - S. R. Miri, Associate professor, Dean Cancer Institute, Tehran University of Medical Sciences. [S.r.miri@tums.ac.ir](mailto:S.r.miri@tums.ac.ir)

# **1. Various Probes of ECT**


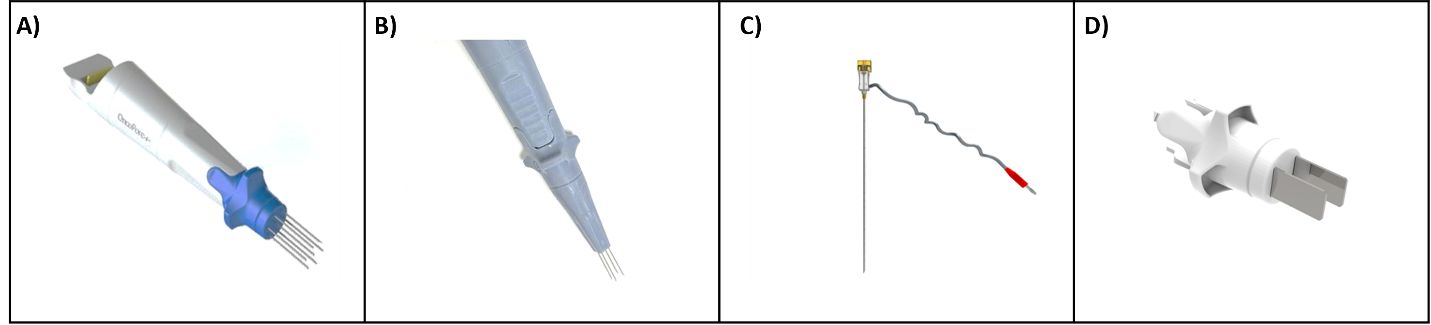


**Figure S1-** A) A hexagonal needle electrode, B) A square array electrode, C) A single needle electrode, D) A plate electrode.
